# Supplementary material
Source: PubMed Central journal article supplement (PMC5616169)
Supplement: NIHMS814266-supplement-supplement_1.pdf [file NIHMS814266-supplement-supplement_1.pdf]

**APPENDIX E1****The Olive View-UCLA Appendicitis Study Group**

Robert Bennion, MD  
 Department of Surgery, Olive View-UCLA Medical Center, Sylmar, CA

Paul Schmit, MD  
 Department of Surgery, Olive View-UCLA Medical Center, Sylmar, CA

Melinda Gibbons, MD, MSHS  
 Department of Surgery, Olive View-UCLA Medical Center, Sylmar, CA

Darryl Hiyama, MD  
 Department of Surgery, Olive View-UCLA Medical Center, Sylmar, CA

Formosa Chen, MD, MPH  
 Department of Surgery, Olive View-UCLA Medical Center, Sylmar, CA

Ali Cheaito, MD  
 Department of Surgery, Olive View-UCLA Medical Center, Sylmar, CA

F. Charles Brunicardi, MD  
 Department of Surgery, Santa Monica-UCLA Medical Center, Santa Monica, CA

Steven Lee, MD  
 Department of Surgery, Harbor-UCLA Medical Center, Torrance, CA

James Dunn, MD  
 Department of Surgery, Ronald Reagan-UCLA Medical Center, Los Angeles, CA

David Flum, MD, MPH  
 Department of Surgery, University of Washington Medical Center, Seattle, WA

Giana Davidson, MD, MPH,  
 Department of Surgery, University of Washington Medical Center, Seattle, WA

Annie Ehlers, MD  
 Department of Surgery, University of Washington Medical Center, Seattle, WA

Rodney Mason, MD  
 USC/LA County Medical Center, Los Angeles, CA

Fredrick M. Abrahamian, DO  
 Department of Emergency Medicine, Olive View-UCLA Medical Center, Sylmar, CA

Tomer Begaz, MD  
 Department of Emergency Medicine, Olive View-UCLA Medical Center, Sylmar, CA

Alan Chiem, MD  
 Department of Emergency Medicine, Olive View-UCLA Medical Center, Sylmar, CA

Jorge Diaz, MD

Department of Emergency Medicine, Olive View-UCLA Medical Center, Sylmar, CA

Pamela Dyne, MD  
 Department of Emergency Medicine, Olive View-UCLA Medical Center, Sylmar, CA

Joshua Hui, MD  
 Department of Emergency Medicine, Olive View-UCLA Medical Center, Sylmar, CA

Luis Lovato, MD  
 Department of Emergency Medicine, Olive View-UCLA Medical Center, Sylmar, CA

Scott Lundberg, MD  
 Department of Emergency Medicine, Olive View-UCLA Medical Center, Sylmar, CA

Amir Rouhani, MD  
 Department of Emergency Medicine, Olive View-UCLA Medical Center, Sylmar, CA

Mathew Waxman, MD  
 Department of Emergency Medicine, Olive View-UCLA Medical Center, Sylmar, CA

Maureen McCollough, MD, MPH  
 Department of Emergency Medicine, Olive View-UCLA Medical Center, Sylmar, CA

Breena Taira, MD, MPH  
 Department of Emergency Medicine, Olive View-UCLA Medical Center, Sylmar, CA

Raquel Torrez, BS,  
 Department of Emergency Medicine, Olive View-UCLA Medical Center, Sylmar, CA

Eva Gonzalez, BA,  
 Department of Emergency Medicine, Olive View-UCLA Medical Center, Sylmar, CA

Christine Sayegh, BS,  
 Department of Emergency Medicine, Olive View-UCLA Medical Center, Sylmar, CA

Paula Seloadji, PharmD,  
 Department of Emergency Medicine, Olive View-UCLA Medical Center, Sylmar, CA

Noemi Quinteros, BS,  
 Department of Emergency Medicine, Olive View-UCLA Medical Center, Sylmar, CA

Gabina Martin, BSN, RN,  
 Department of Emergency Medicine, Olive View-UCLA Medical Center, Sylmar, CA

Roe Salem, BA  
 Department of Emergency Medicine, Olive View-UCLA Medical Center, Sylmar, CA

Lisandra A. Uribe, BS  
 Department of Emergency Medicine, Olive View-UCLA Medical Center, Sylmar, CA

Justin A. De La Guerra, BS

Department of Emergency Medicine, Olive View-UCLA Medical Center, Sylmar, CA

Alexander Garrett, BS

Department of Emergency Medicine, Olive View-UCLA Medical Center, Sylmar, CA

Arthur C. Jeng, MD

Department of Medicine, Olive View-UCLA Medical Center

## APPENDIX E2

### Radiology Methods

Imaging studies were first interpreted by an on-call attending radiologist, which was the interpretation used to decide patient eligibility. Subsequently, imaging was reviewed by a full-time radiologist who recorded findings on a standardized form.

Computed tomography (CT) was performed on a multi-detector row CT scanner (Somatom Definition Flash 64 [Siemens Healthcare, Forchheim, Germany]), using a standard imaging protocol: 120 kVp, 24 x 1.2-mm collimation, pitch of 1, 90-second delay after intravenous contrast administration at 3 mL/sec (Omnipaque 350 mgI/mL [GE Healthcare, Little Chalfont, UK]). Tube current modulation (CARE kv) was used on each case with a quality reference mAs setting of 250, which corresponds to a default CTDI<sub>vol</sub> of 16 mGy. Pediatric CT protocols were utilized for patients less than 18 years of age. Intravenous contrast agent was administered unless contraindicated by decreased glomerular filtration rate less than 30 ml/min or history of severe allergic reaction to iodinated contrast. Enteric contrast material was not administered according to our standard protocol for abdominal CT studies performed in the emergency department. Images were reconstructed in the axial plane at 5-mm and in the coronal plane at 2-mm section thickness, and interpreted on a picture archiving and communication system (PACS) station by a staff radiologist. CT imaging findings were described/dictated using standardized definitions (see below). Ultrasound was performed by using the graded compression technique with a curved 3.5 to 5.0-MHz array and linear 10-MHz array transducers.

We used 4 methods to decrease the radiation dose. We decreased the radiation dose by: (1) Performing a CT abdomen and pelvis with IV contrast only and eliminated the non-contrast CT liver part of the study, which accounts for 40% to 60% of the total radiation dose of a CT of the abdomen and pelvis with and without contrast; (2) Using tube current (mAs) modulation software

Siemens CARE Dose4D in acquisition of CT studies, which adjusts the tube current (mAs) based on the size and shape of the patient; (3) Using tube voltage (kV) modulation software Siemens CARE kV, which adjusts the tube voltage based on the patient's topogram and the selected examination protocol; and (4) Providing CT coronal reformations obtained at 2-mm intervals for all studies, which has been shown to improve confidence in visualization of the appendix and in diagnosis or exclusion of appendicitis, avoiding potential interpretations of equivocal for appendicitis, which may lead to repeat imaging and increased radiation dose.<sup>1</sup>

CT studies were reviewed for the following: appendiceal diameter (maximum wall-to-wall); hyperemia (increased appendiceal wall enhancement relative to adjacent bowel wall); periappendiceal fluid, non-physiologic; periappendiceal stranding, presence, and degree (mild [perceptible haziness or increased attenuation in the mesoappendix or retroperitoneal fat], moderate [significantly increased attenuation and/or stranding of the mesenteric fat at the right side of the pelvis], and severe [extensively increased attenuation and/or stranding of the mesenteric fat at the right side of the pelvis and/or lower part of the abdomen]); phlegmon (diffuse and substantial inflammation of the peri-appendiceal fat with ill-defined fluid, with or without air collections); abscess (discrete fluid, with or without an air collection, with well-defined wall); appendicolith; extraluminal (free air); and mucocele (dilated appendix >15 mm without signs of appendicitis, ie, hyperemia, fat stranding, free fluid, free air, peri-appendiceal phlegmon, or abscess).

Ultrasound studies were interpreted for the following: visualization of the appendix, appendiceal diameter, compressibility of the appendix, peri-appendiceal or right lower quadrant fluid collection, and appendicolith. Appendiceal diameter was measured from serosal to serosal surface while imaging the appendix in the transverse plane. Compressibility was defined as measurable change in the caliber of the lumen of the appendix. A fluid collection had a definable wall and mass effect. Appendicolith was defined as an echogenic, well-defined focus within the appendix with posterior acoustic shadowing.

In addition to recording diagnostic characteristics for each case, each reviewer provided an impression of one of the following: normal appendix, acute uncomplicated appendicitis, acute complicated appendicitis, and equivocal for appendicitis. For CT interpretation, an additional diagnostic option was equivocal for uncomplicated versus complicated appendicitis. The imaging criteria for the final

## REFERENCES

1. Paulson EK, Harris JP, Jaffe TA, et al. Acute appendicitis: added diagnostic value of coronal reformations from isotropic voxels at multi-detector row CT. *Radiology*. 2005;235:879-885.
2. Keyzer C, Geveno PA, eds. *Imaging of Acute Appendicitis in Adults and Children*, 1st ed. Berlin, Germany: Springer Verlag; 2011.
3. Bixby SD, Lucey BC, Soto JA, et al. Perforated versus nonperforated acute appendicitis: accuracy of multidetector CT detection. *Radiology*. 2006;241:780-786.
4. Foley TA, Earnest F IV, Nathan MA, et al. Differentiation of nonperforated from perforated appendicitis: accuracy of CT diagnosis and relationship of CT findings to length of hospital stay. *Radiology*. 2005;235:89-96.
5. Horrow MM, White DS, Horrow JC. Differentiation of perforated from nonperforated appendicitis at CT. *Radiology*. 2003;227:46-51.
6. Yeung KW, Chang MS, Hsiao CP. Evaluation of perforated and nonperforated appendicitis with CT. *Clin Imaging*. 2004;28:422-427.
7. Blumfield E, Nayak G, Srinivasan R, et al. Ultrasound for differentiation between perforated and nonperforated appendicitis in pediatric patients. *AJR Am J Roentgenol*. 2013;200:957-962.
8. Bennett GL, Tanpitukpongse TP, Macari M, et al. CT diagnosis of mucocele of the appendix in patients with acute appendicitis. *AJR Am J Roentgenol*. 2009;192:W103-W110.
9. Pickhardt PJ, Levy AD, Rohrmann CA Jr, et al. Primary neoplasms of the appendix manifesting as acute appendicitis: CT findings with pathologic comparison. *Radiology*. 2002;224:775-781.

diagnosis were derived from a review of literature and included those features previously reported to have diagnostic value.<sup>2-9</sup>

## APPENDIX E3

## Sample Size Calculation

The current operative approach to appendicitis is associated with serious adverse complications in approximately 3% of patients,<sup>1,2</sup> resulting in recovery without serious complications in 97% of cases. Existing trials demonstrate similar rates of recovery among patients treated with primary antibiotic therapy.<sup>3</sup> The rate of uneventful recovery among a relatively healthy population eligible for inclusion in this study is likely to be higher than that observed in the general population. Thus, assuming recovery rates without serious complications in 97% of cases for both treatment arms, and assuming a 5% limit of indifference, a noninferiority trial with a power of 95% and statistical significance of 5% could be completed with 662 patients (331 patients assigned to each arm). Assuming that 10% of patients are unable to complete the study (due to lack of follow-up, protocol violations, and other unforeseen events), the study may need to enroll as many as 736 patients. It has been suggested that pilot studies should include 30 patients or 3% of the sample size for the actual trial, whichever is greater.<sup>4</sup> Under this principle, our estimated sample size for the pilot study is 30 patients (4.5% of the projected sample).

Our limit of indifference of 5% comes from the following analysis. The potential for cost savings drives the use of antibiotics to treat acute uncomplicated appendicitis. Surgical treatment, including emergency department evaluation, physician fees, laboratory and imaging fees, and operating and hospital costs, currently approaches \$8,000 per patient.<sup>1,5,6</sup> Primary treatment with antibiotics eliminates many hospital admissions and operation expenses, and reduces costs by 50% to \$4,000 per case.<sup>7</sup> However, because primary treatment with antibiotics is associated with failure in up to 30% of cases,<sup>3</sup> the costs for treating patients who require surgical rescue is actually \$500 greater than the cost of primary surgery.<sup>7</sup> This effect raises the overall costs of antibiotic treatment with surgical rescue to an average of \$5,350 per patient, which still represents cost savings of \$2,650 per case.

It is possible that initial cost-savings from the use of primary antibiotic treatment could be eroded through increased cost required to treat patients who experience major complications as a result of this treatment. The average cost of treating patients who experience a major complication following appendectomy is \$38,000.<sup>2</sup> This is equivalent to the cost-savings that might be recognized through treating 14 patients with primary antibiotic therapy, and corresponds to a 7% increase in the rate of major complications. Consequently, primary treatment with antibiotic therapy with surgical rescue will present cost advantages provided the associated rate of major complications with this treatment does not exceed the major complication rate of primary surgical treatment by more than 7%.

## REFERENCES

1. Cubas RF, Gomez NR, Rodriguez S, et al. Outcomes in the management of appendicitis and cholecystitis in the setting of a new acute care surgery service model: impact on timing and cost. *J Am Coll Surg*. 2012;215:715-721.
2. Davies GM, Dasbach EJ, Teutsch S. The burden of appendicitis-related hospitalizations in the United States in 1997. *Surg Infect (Larchmt)*. 2004;5:160-165.
3. Vons C, Barry C, Maitre S, et al. Amoxicillin plus clavulanic acid versus appendicectomy for treatment of acute uncomplicated appendicitis: an open-label, non-inferiority, randomized controlled trial. *Lancet*. 2011;377:1573-1579.
4. Billingham SAM, Whitehead AL, Julious SA. An audit of sample sizes for pilot and feasibility trials being undertaken in the United Kingdom registered in the United Kingdom Clinical Research Network database. *BMC Medical Res Methodol*. 2013;13:104-110.
5. Dhupar R, Evankovich J, Ochoa JB, et al. Outcomes of operative management of appendicitis. *Surg Infect (Larchmt)*. 2012;13:141-146.
6. Haas L, Stargardt T, Schreyoegg J. Cost-effectiveness of open versus laparoscopic appendectomy: a multilevel approach with propensity score matching. *Eur J Health Econ*. 2012;13:549-560.
7. Hastings RS, Powers RD. Abdominal pain in the ED: a 35 year retrospective. *Am J Emerg Med*. 2011;29:711-716.

**Table E1.** Baseline characteristics of 30 participants with the diagnosis of acute uncomplicated appendicitis by treatment group.\*

| Characteristic                                                 | Appendectomy (n = 14)       | Antibiotics-First (n = 16)  |
|----------------------------------------------------------------|-----------------------------|-----------------------------|
| <b>Age, median years (IQR, range)</b>                          | 36 (33-46; 24-65)           | 31 (25-40; 9-73)            |
| <b>Male sex</b>                                                | 9 (64.3)                    | 9 (56.3)                    |
| <b>Race</b>                                                    |                             |                             |
| White                                                          | 12 (85.7)                   | 13 (81.3)                   |
| Black                                                          | 0 (0.0)                     | 0 (0.0)                     |
| Asian                                                          | 0 (0.0)                     | 0 (0.0)                     |
| Hawaiian/Pacific Islander                                      | 0 (0.0)                     | 1 (6.3)                     |
| American Indian/Alaska Native                                  | 0 (0.0)                     | 0 (0.0)                     |
| Other                                                          | 1 (7.1)                     | 2 (12.5)                    |
| Unknown                                                        | 1 (7.1)                     | 0 (0.0)                     |
| <b>Hispanic ethnicity</b>                                      | 12 (85.7)                   | 14 (87.5)                   |
| <b>Comorbidities</b>                                           |                             |                             |
| Diabetes                                                       | 0 (0.0)                     | 1 (6.3)                     |
| HIV                                                            | 0 (0.0)                     | 0 (0.0)                     |
| COPD                                                           | 0 (0.0)                     | 0 (0.0)                     |
| CHF                                                            | 0 (0.0)                     | 0 (0.0)                     |
| Cancer                                                         | 0 (0.0)                     | 0 (0.0)                     |
| <b>Body mass index, median kg/m<sup>2</sup> (IQR; range)</b>   | 28.0 (24.6-29.8; 21.0-31.8) | 27.3 (25.1-33.0; 22.3-43.3) |
| <b>Prior abdominal/pelvic surgery</b>                          | 3 (21.4)                    | 3 (18.8)                    |
| Cholecystectomy                                                | 0 (0.0)                     | 1 (6.3)                     |
| Colectomy                                                      | 0 (0.0)                     | 0 (0.0)                     |
| Hysterectomy                                                   | 1 (7.1)                     | 0 (0.0)                     |
| Exploratory laparotomy                                         | 0 (0.0)                     | 0 (0.0)                     |
| Other                                                          | 3 (21.4)                    | 2 (12.5)                    |
| <b>Symptoms</b>                                                |                             |                             |
| Subjective fever                                               | 4 (28.6)                    | 2 (12.5)                    |
| Measured fever                                                 | 1 (7.1)                     | 0 (0.0)                     |
| Anorexia                                                       | 10 (71.4)                   | 11 (68.8)                   |
| Nausea                                                         | 13 (92.9)                   | 12 (75.0)                   |
| Vomiting                                                       | 11 (78.6)                   | 8 (50.0)                    |
| Right lower quadrant pain                                      | 13 (92.9)                   | 14 (87.5)                   |
| Duration of pain, median days (IQR; range)                     | 1.0 (0.5- 3.0; 0.5-5.0)     | 1.0 (1.0-2.5; 0.5-5.0)      |
| Severity of pain                                               |                             |                             |
| Mild                                                           | 1 (7.1)                     | 3 (19.8)                    |
| Moderate                                                       | 6 (42.9)                    | 11 (68.8)                   |
| Severe                                                         | 7 (50.0)                    | 2 (12.5)                    |
| Maximal pain prior 24 hours <sup>†</sup> , median (IQR; range) | 10 (8-10; 5-10)             | 8 (8-10; 4-10)              |
| <b>Signs</b>                                                   |                             |                             |
| Localized rebound tenderness                                   | 10 (71.4)                   | 8 (50.0)                    |
| Localized guarding                                             | 6 (42.9)                    | 6 (37.5)                    |
| Triage pulse, median beats/min (IQR; range)                    | 75 (70-82; 62-124)          | 78 (68-95; 56-107)          |
| Triage SBP, median mm Hg (IQR; range)                          | 112 (107-125; 87-135)       | 121 (107-131; 99-154)       |
| Triage DBP, median mm Hg (IQR; range)                          | 65 (62-72; 53-78)           | 68 (58-77; 48-91)           |
| Triage respirations, median beats/min (IQR; range)             | 17 (17-18; 16-20)           | 18 (17-18; 16-20)           |
| Triage temperature, median °C (IQR; range)                     | 36.9 (36.6-36.7; 36.5-38.1) | 36.8 (36.7-37.2; 36.4-37.3) |
| <b>Computed tomographic findings<sup>‡</sup></b>               |                             |                             |
| Appendicolith <sup>§</sup>                                     | 3 (21.4)                    | 2 (12.5)                    |
| Appendiceal diameter, median mm (IQR; range)                   | 9 (9-12; 7-8)               | 10 (9-12; 7-14)             |
| Periappendiceal stranding                                      |                             |                             |
| None                                                           | 0 (0.0)                     | 2 (12.5)                    |
| Mild                                                           | 7 (50.0)                    | 11 (68.8)                   |
| Moderate                                                       | 6 (42.9)                    | 1 (6.3)                     |
| Severe                                                         | 1 (7.1)                     | 0 (0.0)                     |
| NA                                                             | 0 (0.0)                     | 1 (6.3)                     |
| Hyperemia                                                      |                             |                             |
| Yes                                                            | 14 (100.0)                  | 11 (68.8)                   |
| No                                                             | 0 (0.0)                     | 4 (25.0)                    |
| NA                                                             | 0 (0.0)                     | 1 (6.3)                     |

**Table E1.** Continued.

| Characteristic                                                                   | Appendectomy (n = 14)        | Antibiotics-First (n = 16)  |
|----------------------------------------------------------------------------------|------------------------------|-----------------------------|
| Periappendiceal fluid                                                            |                              |                             |
| Yes                                                                              | 3 (21.4)                     | 2 (12.5)                    |
| No                                                                               | 11 (78.6)                    | 13 (81.3)                   |
| NA                                                                               | 0 (0.0)                      | 1 (6.3)                     |
| <b>Laboratory results</b>                                                        |                              |                             |
| WBC count, x10 <sup>3</sup> /μL, median (IQR; range)                             | 15.3 (11.0-18.4; 8.1-23.1)   | 14.2 (11.3-17.0; 6.2-19.2)  |
| Neutrophils, median % (IQR; range)                                               | 83.8 (81.7-89.2; 60.2-94.4)  | 82.7 (79.8-90.9; 49.8-92.9) |
| Lactate, median mmol/L (IQR; range) <sup>  </sup>                                | 1.0 (0.9-1.4; 0.6-1.6)       | 1.1 (0.9-1.5; 0.7-2.3)      |
| CRP, median mg/L (IQR; range) <sup>  </sup>                                      | 64.8 (42.6-101.6; 8.2-256.4) | 25.9 (10.8-64.8; 3.8-202.6) |
| <b>Alvarado score<sup>†</sup></b> , median (IQR; range)                          | 8 (7-9; 4-10)                | 8 (7-9; 4-10)               |
| <b>Received first parenteral antibiotic dose &lt;6 hours prior to enrollment</b> | 4 (28.6)                     | 5 (31.3)                    |
| <b>Appendix pathology findings</b>                                               |                              |                             |
| Normal                                                                           | 1 (7.1)                      |                             |
| Acute uncomplicated                                                              | 9 (64.3)                     |                             |
| Suppurative and/or gangrenous                                                    | 4 (28.6)                     |                             |
| <b>Quality-of-life measures</b>                                                  |                              |                             |
| SF-12v2 Physical Component Score <sup>#</sup> , median (IQR; range)              | 52.0 (47.4-57.0; 25.4-61.4)  | 55.9 (54.4-57.1; 41.7-64.1) |
| SF-12v2 Mental Component Score <sup>#</sup> , median (IQR; range)                | 57.0 (41.9-61.2; 31.6-68.4)  | 49.4 (38.8-61.1; 35.5-62.1) |

COPD, chronic obstructive pulmonary disease; CHF, congestive heart failure; NA, not available; SBP, systolic blood pressure; DBP, diastolic blood pressure.

\*Data are presented as No. (%) unless otherwise indicated.

<sup>†</sup>Pain was rated on a scale of 0 to 10.

<sup>‡</sup>One pediatric participant randomized to antibiotics-first did not receive a CT scan, so results are only presented for the 15 adult participants who did.

<sup>§</sup>Radiographic identification of an appendicolith was initially an exclusion criterion but was later allowed (after 11 of 30 participants were enrolled) because of lack of consistent evidence of this being a risk factor for antibiotic failure.

<sup>||</sup>Two participants in the appendectomy group were missing results for lactate and CRP.

<sup>¶</sup>The Alvarado score<sup>28</sup> consists of the following components (points): right lower quadrant tenderness (0/2); elevated temperature ( $\geq 37.3^{\circ}\text{C}$  or  $99.1^{\circ}\text{F}$ ) (0/1); rebound tenderness (0/1); migration of pain to the right lower quadrant (0/1); anorexia (0/1); nausea or vomiting (0/1); leukocytosis  $>10,000$  cells/ $\mu\text{L}$  (0/2); polymorphonuclear cells  $>75\%$  (0/1).

<sup>#</sup>SF-12v2<sup>®</sup> Health Survey Acute version<sup>24</sup> (1-week recall) was utilized for adult (14 appendectomy and 15 antibiotic-first) participants to assess baseline quality of life prior to their appendicitis symptoms.

**Table E2.** Baseline characteristics of qualifying enrolled and nonenrolled patients with the diagnosis of acute uncomplicated appendicitis.\*

| Characteristic                                           | Enrolled n = 30             | Non-Enrolled n = 18         |
|----------------------------------------------------------|-----------------------------|-----------------------------|
| <b>Median age, years (IQR, range)</b>                    | 33 (29-45; 9-73)            | 29 (21-35; 12-55)           |
| <b>Male sex</b>                                          | 16 (60.0)                   | 13 (72.2)                   |
| <b>Race</b>                                              |                             |                             |
| White                                                    | 25 (83.3)                   | 18 (100.0)                  |
| Black                                                    | 0 (0.0)                     | 0 (0.0)                     |
| Asian                                                    | 0 (0.0)                     | 0 (0.0)                     |
| Hawaiian/Pacific Islander                                | 1 (3.3)                     | 0 (0.0)                     |
| American Indian/Alaska Native                            | 0 (0.0)                     | 0 (0.0)                     |
| Other                                                    | 3 (10.0)                    | 0 (0.0)                     |
| Unknown                                                  | 1 (3.3)                     | 0 (0.0)                     |
| <b>Hispanic ethnicity</b>                                | 26 (86.7)                   | 17 (94.4)                   |
| <b>Symptoms</b>                                          |                             |                             |
| Subjective fever                                         | 6 (20.0)                    | 3 (16.7)                    |
| Anorexia                                                 | 21 (68.8)                   | 7 (38.9)                    |
| Nausea                                                   | 25 (75.0)                   | 14 (77.8)                   |
| Vomiting                                                 | 19 (50.0)                   | 8 (44.4)                    |
| Right lower quadrant pain                                | 27 (87.5)                   | 17 (94.4)                   |
| Duration of pain, median days (IQR; range)               | 1.0 (1.0-3.0; 0.5-5.0)      | 1.0 (1.0-1.5; 0.5-4.0)      |
| Severity of pain                                         |                             |                             |
| Mild                                                     | 4 (19.8)                    | 2 (11.1)                    |
| Moderate                                                 | 17 (68.8)                   | 13 (72.2)                   |
| Severe                                                   | 9 (12.5)                    | 3 (16.7)                    |
| <b>Signs</b>                                             |                             |                             |
| Triage temperature, median °C (IQR; range)               | 36.9 (36.7-37.2; 36.4-38.1) | 36.9 (36.7-37.3; 36.6-38.2) |
| <b>Computed tomographic findings<sup>†</sup></b>         |                             |                             |
| Appendicolith <sup>‡</sup>                               | 5/29 (17.2)                 | 1/17 (5.9)                  |
| Appendiceal diameter, median mm (IQR; range)             | 10 (9-12; 7-18)             | 11 (10-14; 7-20)            |
| Periappendiceal stranding                                |                             |                             |
| None                                                     | 2 (6.9)                     | 0 (0.0)                     |
| Mild                                                     | 18 (62.1)                   | 12 (70.6)                   |
| Moderate                                                 | 7 (24.1)                    | 4 (23.5)                    |
| Severe                                                   | 1 (3.4)                     | 1 (5.9)                     |
| NA                                                       | 1 (3.4)                     | 0 (0.0)                     |
| Hyperemia                                                |                             |                             |
| Yes                                                      | 24 (82.8)                   | 16 (94.1)                   |
| No                                                       | 4 (13.8)                    | 1 (5.9)                     |
| NA                                                       | 1 (3.4)                     | 0 (0.0)                     |
| Periappendiceal fluid                                    |                             |                             |
| Yes                                                      | 5 (12.5)                    | 4 (23.5)                    |
| No                                                       | 24 (82.8)                   | 13 (76.5)                   |
| NA                                                       | 1 (3.4)                     | 0 (0.0)                     |
| <b>Laboratory results</b>                                |                             |                             |
| WBC count, median $\times 10^3/\mu\text{L}$ (IQR; range) | 15.0 (11.3-17.0; 6.2-23.1)  | 15.1 (11.9-17.2; 9.4-19.1)  |
| Neutrophils, median % (IQR; range)                       | 83.9 (81.1-89.7; 49.8-94.4) | 81.8 (72.1-85.9; 57.8-94.8) |
| <b>Alvarado score<sup>§</sup>, median (IQR; range)</b>   | 8 (7-9; 4-10)               | 8 (6-8; 3-9)                |
| <b>Appendix pathology findings</b>                       |                             |                             |
| Normal                                                   | 1/14 (7.1)                  | 0 (0.0)                     |
| Acute uncomplicated                                      | 9/14 (64.3)                 | 12 (70.6)                   |
| Suppurative and/or gangrenous                            | 4/14 (28.6)                 | 5 (29.4)                    |
| Perforated                                               | 0/14 (0.0)                  | 1 (5.9)                     |
| <b>Received appendectomy</b>                             | 14/14 (100)                 | 17 (94.4)                   |
| Open                                                     | 5 (35.7)                    | 6/17 (35.2)                 |
| Laparoscopic                                             | 9 (64.3)                    | 11/17 (64.7)                |
| <b>Major complications</b>                               | 3 (10.0)                    | 0 (0.0)                     |

\*Data are presented as No. (%) unless otherwise indicated.

<sup>†</sup>One patient of pediatric age in each group did not get a computed tomography scan.

<sup>‡</sup>Radiographic identification of an appendicolith was initially an exclusion criterion but was later allowed (after 11 of 30 participants were enrolled) because of lack of consistent evidence of this being a risk factor for antibiotic failure.

<sup>§</sup>The Alvarado score<sup>24</sup> consists of the following components (points): right lower quadrant tenderness (0/2); elevated temperature ( $\geq 37.3^\circ\text{C}$  or  $99.1^\circ\text{F}$ ) (0/1); rebound tenderness (0/1); migration of pain to the right lower quadrant (0/1); anorexia (0/1); nausea or vomiting (0/1); leukocytosis  $>10,000$  cells/ $\mu\text{L}$  (0/2); polymorphonuclear cells  $>75\%$  (0/1).

**Randomized to Surgery****Complication - Unplanned intubation due to retroperitoneal trocar-related injury with ICU admission on day 1**

A 34-year old male with no major co-morbidities or past surgeries presented with a half-day history of severe abdominal pain with anorexia, nausea, and vomiting, and examination findings of localized right lower quadrant abdominal tenderness without rebound or guarding. His WBC count was  $17.0 \times 10^3/\mu\text{L}$  and his computed tomography (CT) scan revealed a 9-mm diameter appendix and mild stranding with hyperemia. He underwent laparoscopic appendectomy, which demonstrated appendicitis with no purulent fluid, gangrene, perforation, or abscess. Intraoperatively, a retroperitoneal hematoma was observed. Intubation was maintained, the participant was admitted for one day to the ICU for observation, and recovered without need for blood transfusion.

**Complications - Organ space infection (pelvic abscess diagnosed 2 days after discharge) and unplanned hospitalization on day 5**

A 59-year-old female with no major co-morbidities and prior Caesarian section presented with a 5-day history of severe abdominal pain with anorexia and nausea, and examination findings of right lower quadrant abdominal rebound tenderness and guarding. Her WBC count was  $8.1 \times 10^3/\mu\text{L}$  and her CT scan revealed a 7-mm diameter appendix with an appendicolith and moderate stranding and hyperemia,

and no periappendiceal fluid. She underwent open appendectomy and inflammation of the cecum was observed, but the appendix appeared normal and was normal on pathology review. The participant returned on day 5 (2 days after being discharged from the hospital) complaining of suprapubic pain and a CT scan revealed a 5-cm fluid collection with an enhancing wall in the pelvis consistent with an abscess. The participant received percutaneous drainage and antibiotics and recovered.

**Randomized to Antibiotics-First****Complication - Organ space infection and unplanned hospitalization due to recurrent perforated appendicitis on day 18**

A 37-year-old female with no other major co-morbidities or past surgeries presented with a 4-day history of moderate abdominal pain with chills and anorexia, and examination findings of right lower quadrant abdominal rebound tenderness without guarding. Her WBC count was  $11.9 \times 10^3/\mu\text{L}$  and her CT scan revealed a 9-mm diameter appendix and moderate stranding and hyperemia and no appendicolith. The participant gradually improved, and on day 11 reported no pain and had no abdominal tenderness. On day 18, the participant returned with right lower quadrant pain and a CT revealed a 10-mm appendix with an associated phlegmon and 1.3-cm fluid collection. The participant wished to avoid surgery. She was treated with antibiotics and recovered. She was offered and declined interval appendectomy.

**Figure E1.** Summary of major complications.

**Table E3.** Pain, analgesic use, activity, and quality-of-life outcomes of 30 participants with the diagnosis of acute uncomplicated appendicitis by treatment group.\*

| Characteristic                                                            | Appendectomy (n=14)     | Antibiotics-First (n=16) |
|---------------------------------------------------------------------------|-------------------------|--------------------------|
| <b>Number of participants pain-free</b>                                   |                         |                          |
| At day 2 <sup>†</sup>                                                     | 0 (0.0)                 | 5 (31.3)                 |
| Day 3-5                                                                   | 1 (7.1)                 | 10 (62.5)                |
| Two weeks                                                                 | 2 (14.3)                | 12 (75.0)                |
| One month                                                                 | 9 (64.3)                | 14 (87.5)                |
| <b>Total days on analgesics, median (IQR; range)</b>                      |                         |                          |
| Through day 2                                                             | 1.0 (0.0-1.0; 0.0-1.0)  | 0.5 (0.0-1.0; 0.0-1.0)   |
| Day 3-5                                                                   | 2.0 (1.0-2.0; 0.0-3.0)  | 1.0 (0.0-1.0; 0.0-3.0)   |
| Two weeks                                                                 | 4.0 (2.0-6.0; 1.0-10.0) | 1.0 (0.0-1.0; 0.0-12)    |
| One month                                                                 | 4.5 (3.0-8.0; 1.0-24.0) | 1.0 (0.0-1.5; 0.0-12)    |
| <b>Maximal pain score<sup>‡</sup> prior 24 hours, median (IQR; range)</b> |                         |                          |
| Day 2                                                                     | 9.0 (7.0-9.0; 4.0-10.0) | 4.5 (3.0-6.5; 1.0-9.0)   |
| Day 3-5                                                                   | 4.5 (4.0-6.0; 2.0-8.0)  | 2.0 (0.5-5.5; 0.0-7.0)   |
| Two weeks                                                                 | 3.5 (1.0-4.0; 0.0-8.0)  | 0.0 (0.0-2.0; 0.0-7.0)   |
| One month                                                                 | 1.0 (0.0-4.0; 0.0-8.0)  | 0.0 (0.0-2.0; 0.0-6.0)   |
| <b>Total days missed normal activities, median (IQR; range)</b>           |                         |                          |
| Through day 2                                                             | 1.0 (1.0-1.0; 0-1.0)    | 1.0 (0.0-1.0; 0.0-1.0)   |
| Day 3-5                                                                   | 2.0 (2.0-3.0; 1.0-4.0)  | 1.0 (0.5-2.5; 0.0-4.0)   |
| Two weeks                                                                 | 2.5 (2.0-9.0; 1.0-13)   | 1.0 (0.5-2.5; 0.0-6.0)   |
| One month                                                                 | 4.0 (2.0-9.0; 1.0-28)   | 1.0 (0.5-2.5; 0.0-6.0)   |
| <b>Unable to perform normal activities</b>                                |                         |                          |
| At day 2                                                                  | 14/14 (100.0)           | 10/16 (62.5)             |
| Day 2 to 3-5                                                              | 12/14 (85.7)            | 7/16 (43.8)              |
| Day 3-5 to two weeks                                                      | 6/14 (42.9)             | 1/15 (6.7)               |
| Two weeks to one month                                                    | 2/13 (15.4)             | 0/15 (0.0)               |
| <b>Total days missed work or school, median (IQR; range)</b>              |                         |                          |
| Through day 2                                                             | 1.0 (0.5-1.0; 0.0-1.0)  | 1.0 (1.0-1.0; 0.0-1.0)   |
| Day 3-5                                                                   | 2.5 (1.5-3.0; 0.0-4.0)  | 1.0 (1.0-3.0; 0.0-3.0)   |
| Two weeks                                                                 | 3.5 (2.0-10; 1.0-13)    | 2.0 (1.0-3.0; 0.0-7.0)   |
| One month                                                                 | 3.5 (2.5-22; 2.0-28)    | 2.0 (1.0-3.0; 0.0-7.0)   |
| <b>Missed any work or school</b>                                          |                         |                          |
| At day 2                                                                  | 8/8 (100)               | 10/13 (76.9)             |
| Day 2 to 3-5                                                              | 6/8 (75.0)              | 7/13 (53.8)              |
| Day 3-5 to two weeks                                                      | 5/8 (62.5)              | 4/12 (33.3)              |
| Two weeks to one month                                                    | 4/8 (50.0)              | 0/12 (0.0)               |
| <b>Quality-of-life measures</b>                                           |                         |                          |
| SF-12v2 Physical Component Score <sup>  </sup> , median (IQR; range)      |                         |                          |
| At two weeks                                                              | 44 (36-51; 31-56)       | 54 (52-58; 38-63)        |
| One month                                                                 | 47 (40-53; 32-55)       | 56 (47-57; 33-62)        |
| SF-12v2 Mental Component Score <sup>  </sup> , median (IQR; range)        |                         |                          |
| At two weeks                                                              | 58 (48-61; 17-68)       | 55 (53-59; 38-61)        |
| One month                                                                 | 56 (43-58; 37-68)       | 55 (49-57; 36-63)        |
| PEDsQL Physical Health Score <sup>¶</sup>                                 |                         |                          |
| At two weeks                                                              |                         | 97                       |
| One month                                                                 |                         | 97                       |
| PEDsQL Psychosocial Health Score <sup>¶</sup>                             |                         |                          |
| At two weeks                                                              |                         | 95                       |
| One month                                                                 |                         | 95                       |

\*Data are presented as No. (%) unless otherwise indicated.

<sup>†</sup>Follow-up visits occurred at day 2, day 3-5, two weeks (day 10-18) and one month (day 25-35) after enrollment (day 1).

<sup>‡</sup>Pain was rated on a scale of 0-10, 10 being the most pain.

<sup>§</sup>Not all participants worked or went to school, so were omitted from these descriptions. Denominators are indicated.

<sup>||</sup>SF-12v2<sup>®</sup> Health Survey Acute version<sup>24</sup> (1-week recall) was utilized for adult (14 appendectomy and 15 antibiotic-first) participants at two weeks and the 4-week recall version at one month.

<sup>¶</sup>The PEDsQL<sup>™</sup> Survey Acute version<sup>27</sup> child report for ages 8-12 years (1-week recall) was utilized for the pediatric participant (randomized to antibiotics-first) at two weeks and the 4-week recall version at one month.



**Table E4.** Number of adverse events by severity\* and treatment group through 1 month for 30 participants with the diagnosis of acute uncomplicated appendicitis.

| Adverse Event                               | All          | Appendectomy |              |                   | Antibiotics-First |          |
|---------------------------------------------|--------------|--------------|--------------|-------------------|-------------------|----------|
|                                             |              | Mild         | Moderate     | Life- Threatening | Mild              | Moderate |
| Diarrhea                                    | 14           | 1            | 1            | 0                 | 11                | 1        |
| Back pain                                   | 14           | 9            | 0            | 0                 | 5                 | 0        |
| Subjective fever/chills                     | 11           | 5            | 0            | 0                 | 6                 | 0        |
| Nausea                                      | 9            | 2            | 0            | 0                 | 7                 | 0        |
| Headache                                    | 9            | 1            | 0            | 0                 | 6                 | 2        |
| Anorexia                                    | 7            | 2            | 0            | 0                 | 5                 | 0        |
| Constipation                                | 6            | 1            | 1            | 0                 | 4                 | 0        |
| Abdominal pain (new)                        | 4            | 1            | 0            | 0                 | 1                 | 2        |
| Rash                                        | 4            | 2            | 0            | 0                 | 2                 | 0        |
| Dizziness                                   | 3            | 1            | 0            | 0                 | 2                 | 0        |
| All other <sup>†</sup>                      | 22           | 4            | 3            | 1                 | 13                | 1        |
| <b>Total events</b>                         | <b>103</b>   | <b>29</b>    | <b>5</b>     | <b>1</b>          | <b>62</b>         | <b>6</b> |
| Number per participant, median (IQR; range) | 3 (1-4; 0-9) |              | 2 (1-3; 0-6) |                   | 4 (1-7; 1-9)      |          |

\*All adverse events were graded for severity as follows: mild (Grade 1), events that required minimal or no treatment and did not interfere with the participant's daily activities; moderate (Grade 2), events that resulted in a low level of inconvenience or concern with the therapeutic measures, and may have caused some interference with functioning; severe (Grade 3), events that interrupted a participant's usual daily activity and may have required systemic drug therapy or other treatment, and were incapacitating; and life-threatening (Grade 4), any adverse drug experience that placed the participant at immediate risk of death, not including a reaction that had it occurred in a more severe form, might have caused death.<sup>29</sup>

<sup>†</sup>Other adverse events graded as mild in the antibiotics-first group were fatigue (1), metallic smelling mouth (1), gastritis (2), bloating (1), yeast infection (1), chest pressure (1), right leg and testicular numbness (1), vaginal itchiness (1), irritation with bowel movements (1), itching (1), inability to pass gas/bloating (1), and burning on urination (1). The adverse event graded as moderate in the antibiotics-first group was a phlegmon. Adverse events graded as mild in the appendectomy group were abdominal cramping (1), chest pain (1), testicular pain (1), and double vision (1), and adverse events graded as moderate were intraabdominal abscess (1), sore throat (1), and numbness in abdomen (1). The adverse event graded as life-threatening in the appendectomy group was a trochar-related injury causing a retroperitoneal hematoma that required prolonged intubation and ICU admission for observation but no blood transfusions.
